3. Tenney SM, Lamb TW: Physiological consequences of hypoventilation and hyperventilation, *Handbook of Physiology*. Section 3, Respiration, volume II. Edited by WO Fenn, H Rahn. Washington D.C., American Physiological Society, 1965, chapter 37
4. Nejad NS, Ogden E: Effect of blood pH and CO<sub>2</sub> tension on performance of the heart lung preparation. *Proc Soc Exp Biol Med* 126:771-776, 1967
5. Price HL: Effect of carbon dioxide on the cardiovascular system. *ANESTHESIOLOGY* 21:652-662, 1960
6. Cross BA, Silver IA: Central activation of sympathoadrenal system by hypoxia and hypercapnia. *J Endocrinol* 24:91-103, 1962
7. Downing SE, Siegal JH: Baroreceptor and chemoreceptor influences on sympathetic discharge to the heart. *Am J Physiol* 204:471-479, 1963
8. Whitney RJ: The measurement of volume changes in the human limb. *J Physiol* 121:1, 1953
9. Millar RA, Biscoe TJ: Postganglionic sympathetic discharge and the effect of inhalation anesthetics. *Br J Anaesth* 38:92-114, 1966
10. Norman J, Atkinson SA: The effect of cardiac sympathetic blockade on the relationship between cardiac output and carbon dioxide tension in anesthetized dogs. *Br J Anaesth* 42:592-602, 1970
11. Skovsted T, Price ML, Price HL: The effects of halothane on arterial pressure, pre-ganglionic sympathetic activity, and barostatic reflexes. *ANESTHESIOLOGY* 31:507-514, 1969
12. Price HL, Warden JC, Cooperman LH, et al: Central sympathetic excitation caused by cyclopropane. *ANESTHESIOLOGY* 30:426-438, 1969
13. Skovsted P, Price HL: Central sympathetic excitation caused by fluroxene. *ANESTHESIOLOGY* 32:210-217, 1970
14. Feisal KA, Abboud FM, Eckstein J: Effects of adrenergic blockade on cardiovascular responses to airway pressure. *Am J Physiol* 213:127-133, 1967
15. Morgan BC, Martin WE, Hornbein TF, et al: Hemodynamic effects of intermittent positive-pressure respiration. *ANESTHESIOLOGY* 27:584-590, 1966
16. Cullen DJ, Eger EI II, Gregory GA: The cardiovascular effects of carbon dioxide in man, conscious and during cyclopropane anesthesia. *ANESTHESIOLOGY* 31:407-413, 1969
17. Hornbein TF, Martin WE, Bonica JJ, et al: Nitrous oxide effects of the circulatory and ventilatory responses to halothane. *ANESTHESIOLOGY* 31:250-260, 1969
18. Prys-Roberts C, Kelman GR, Kain C, et al: Cardiac output and carbon dioxide levels during halothane anesthesia in man. *Br J Anaesth* 39:687-688, 1967
19. Prys-Roberts C, Kelman GR, Kain C, et al: Circulatory influences of artificial ventilation during nitrous oxide anesthesia in man. II. Results: The relative influences of mean intrathoracic pressure and arterial carbon dioxide tension. *Br J Anaesth* 39:533-547, 1967
20. Cullen BF, Eger EI II, Smith NT, et al: The circulatory response to hypercapnia during fluroxene anesthesia in man. *ANESTHESIOLOGY* 34:415-420, 1971
21. Cromwell TH, Stevens WC, Eger EI II, et al: The cardiovascular effect of compound 469 (Forane) during spontaneous ventilation and CO<sub>2</sub> challenge in man. *ANESTHESIOLOGY* 35:17-25, 1971
22. Marshall BJ, Klingenstein CH, Neigh JL, et al: Some pulmonary and cardiovascular effects of enflurane (Ethrane) anesthesia with varying PaCO<sub>2</sub> in man. *Br J Anaesth* 43:996-1002, 1971

## Drugs and Their Actions

**SCOPOLAMINE DELIRIUM** The effects of intravenously administered physostigmine on scopolamine-induced confusion and amnesia were studied in the parturient patient. Physostigmine completely reversed the central depression and amnesia produced by scopolamine. All patients became cooperative and oriented within 3 to 5 minutes and had good antegrade memory after administration of the drug. The effectiveness of physostigmine in this preliminary study warrants more definitive studies of the maternal and fetal effects of the drug. (Smiler, B., Bartholomew, E.G., Sicak, B.J., and others: *Physostigmine Reversal of Scopolamine Delirium in Obstetric Patients*. *Am J Obstet Gynecol* 115: 326-329, 1973.)
